# Supplementary material for: Species-specific differences in NPC1 protein trafficking govern therapeutic response in Niemann-Pick type C disease
Source: JCI journal article supplement (doi:10.1172/jci.insight.160308), 2022-10-27
Supplement: sd1 [file 1]

## Supplementary Methods and Data

### Species-specific differences in NPC1 protein trafficking govern therapeutic response in Niemann-Pick type C disease

**Authors:** Mark L. Schultz<sup>1,\*</sup>, Kylie J. Schache<sup>1</sup>, Ruth D. Azaria<sup>1</sup>, Esmée Q. Kuiper<sup>1</sup>, Steven Erwood<sup>2,3</sup>, Evgueni A. Ivakine<sup>2,4</sup>, Nicole Y. Farhat<sup>5</sup>, Forbes D. Porter<sup>5</sup>, Koralege C. Pathmasiri<sup>6</sup>, Stephanie M. Cologna<sup>6</sup>, Michael D. Uhler<sup>7,8</sup>, Andrew P. Lieberman<sup>1,\*</sup>

#### **Affiliations:**

<sup>1</sup>*Department of Pathology, University of Michigan Medical School, Ann Arbor, Michigan, USA.*

<sup>2</sup>*Program in Genetics and Genome Biology, The Hospital for Sick Children Research Institute, Toronto, Ontario, Canada.*

<sup>3</sup>*Department of Molecular Genetics, University of Toronto, Toronto, Ontario, Canada.*

<sup>4</sup>*Department of Physiology, University of Toronto, Toronto, Ontario, Canada.*

<sup>5</sup>*Division of Translational Medicine, Eunice Kennedy Shriver National Institute of Child Health and Human Development, National Institutes of Health, DHHS, Bethesda, Maryland, USA.*

<sup>6</sup>*Department of Chemistry, University of Illinois Chicago, Illinois, USA.*

<sup>7</sup>*Michigan Neuroscience Institute, University of Michigan Medical School, Ann Arbor, Michigan, USA.*

<sup>8</sup>*Department of Biological Chemistry, University of Michigan Medical School, Ann Arbor, Michigan, USA.*

\*Corresponding authors. Email: [scmark@med.umich.edu](mailto:scmark@med.umich.edu); [liebermn@med.umich.edu](mailto:liebermn@med.umich.edu)

## Supplementary methods

*I1061T mice:* I1061T mice were genotyped as previously described (1). For liver collection, 6-week-old mice were anesthetized, perfused with saline, and livers were flash frozen in liquid nitrogen. Livers were then homogenized, sonicated in RIPA, and non-dissociated tissue was removed by centrifugation at 3000xg 4°C for 5 minutes. Protein concentration of the supernatant was calculated using DC™-protein assay (Bio-Rad) and normalized. 50 µg of lysate was added to each reaction and EndoH was performed as in the main text.

*RT-qPCR:* TRIzol® (Thermo Fisher 15596018) was used to collect RNA. RNA was converted to cDNA using the High Capacity Reverse Transcription kit (Applied Biosystems 4368814). Quantitative real-time PCR was conducted in technical replicates using 10 ng cDNA, TaqMan™ probes (Thermo Fisher) for 18s (4310893), TBP (Hs00427620, Mm01277042), NPC1 (Hs00264835, Mm00435300), Syn1 (Hs01018066), Map2 (Hs00258900), and MapT (Hs00902194). RT-qPCR was performed using ABI 7900HT Sequence Detection System and relative expression was calculated by the 2<sup>-ΔΔCt</sup> method using SDS software.

*Pluripotency staining:* The Pluripotent Stem Cell 4-Marker Immunocytochemistry Kit (ThermoFisher A24881) was used following the manufacturer's instructions.

*iNeuron differentiation staining:* Cells were washed 3X with DPBS+/+ and fixed with 4% PFA for 20 minutes. After 3 washes, cells were permeabilized using 0.1% triton for 3 minutes then blocked (10% NGS, 1% BSA). Cells were incubated overnight at 4°C with MAP2 antibody (Cell Signaling 4542, 1:50) diluted in block solution. The following day cells were washed 3 times in DPBS+/+ then labeled with secondary antibody at 1:500 for 1 hour at room temperature. Cells were washed 3 times in DPBS+/+ and mounted with VectaShield containing DAPI.

*Karyotyping:* Chromosomes were harvested and analyzed using a GTW banding methods. Of 20 metaphase cells analyzed, all were characteristic of a chromosomally normal male karyotype. Three of these metaphase spreads were digitally processed to produce a karyotype/karyogram to perform a detailed analysis for variant counts and structural aberrations.

*Cell Viability:* iNeurons were treated with vehicle or dantrolene for 5 days and cell viability was determined using the CyQuant Xtt Cell Viability Assay (Thermo Fisher X12223) following the manufacturer's instructions.

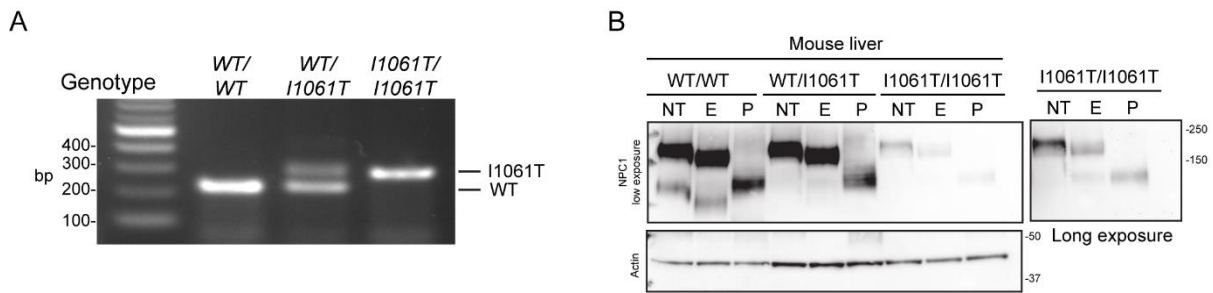

**Supplementary Figure 1. Confirmation of mouse I1061T-NPC1 trafficking. (A)** I1061T mouse genotyping. **(B)** Liver lysates from WT (WT/WT), I1061T heterozygous (WT/I1061T), or I1061T homozygous (I1061T/I1061T) were incubated with no treatment (NT), or digested with EndoH (E), or PNGase F (P), then subject to Western blot.

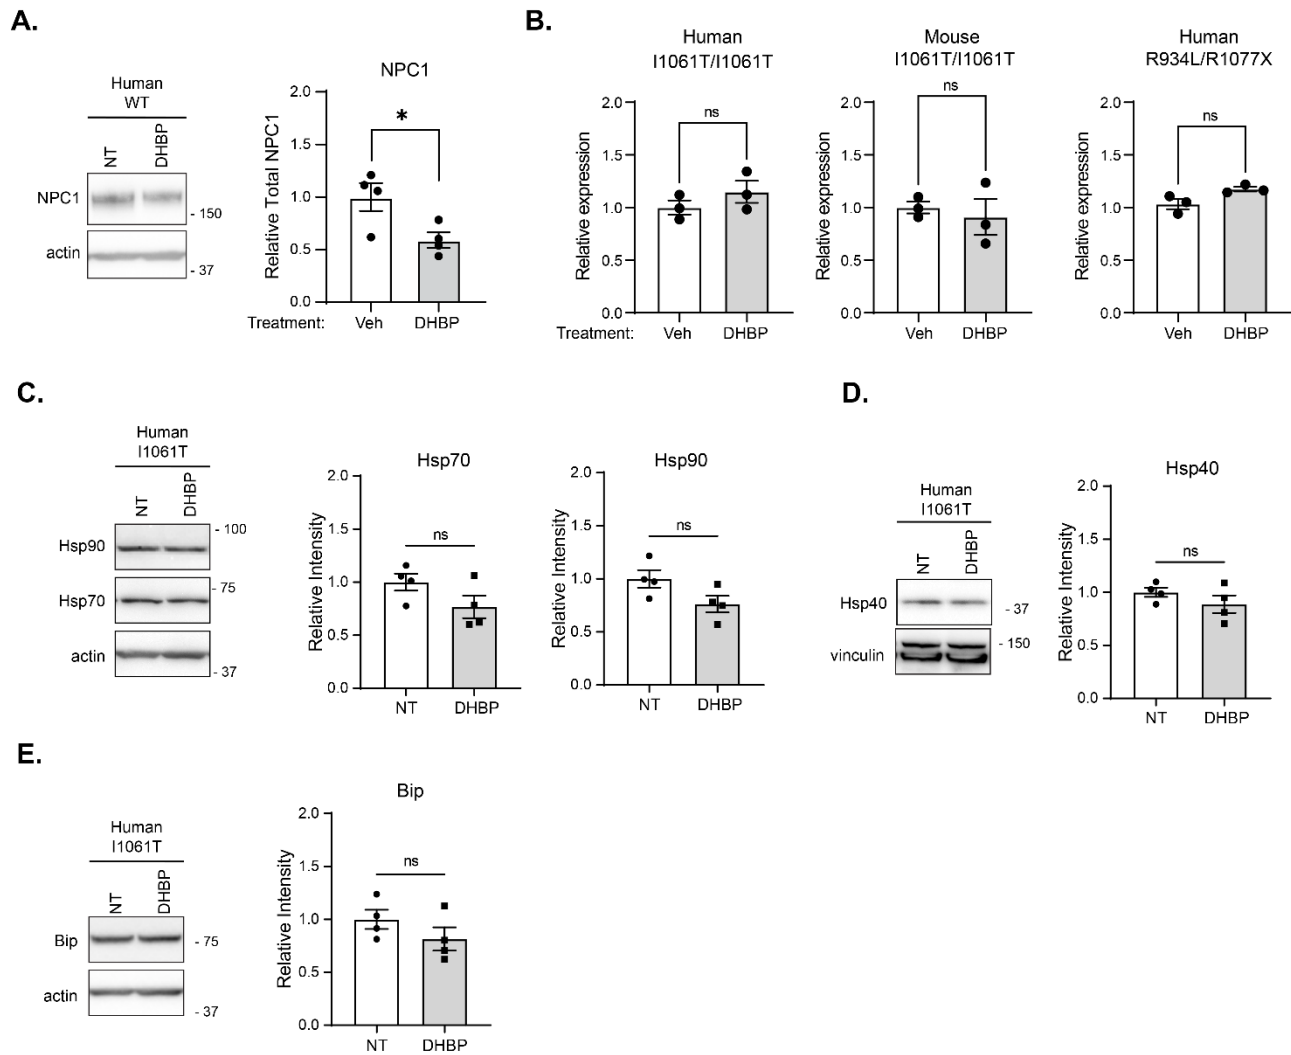

**Supplementary Figure 2. DHBP does not alter *NPC1* gene expression or chaperones.** Primary human and mouse I1061T/I1061T or human R934L/R1077X fibroblasts were treated with 5  $\mu$ M DHBP (daily) or with vehicle (PBS) for five days, and NPC1 mRNA expression (normalized to TBP) was analyzed by qPCR. Data are mean  $\pm$  s.e.m. from **A.** 4, **B.** 3, **C.** 4, **D.** 4, and **E.** 4 independent experiments. n.s., not significant,  $*P \leq 0.05$  by two-tailed t test **A.**  $t = 2.7$ ,  $df = 6$ ; **B.**  $t = 1.2$ , 0.5, 2.6;  $DF = 4$ ; **C.**  $t = 1.6$ , 2.1,  $df = 6$ ; **D.**  $t = 1.2$ ,  $df = 6$ ; **E.**  $t = 1.3$ ,  $df = 6$ .

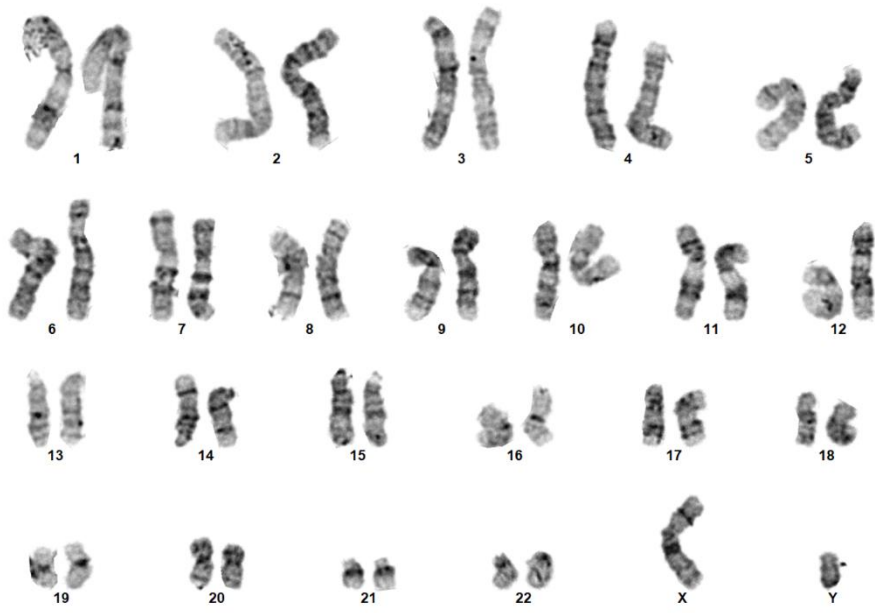

I1061T

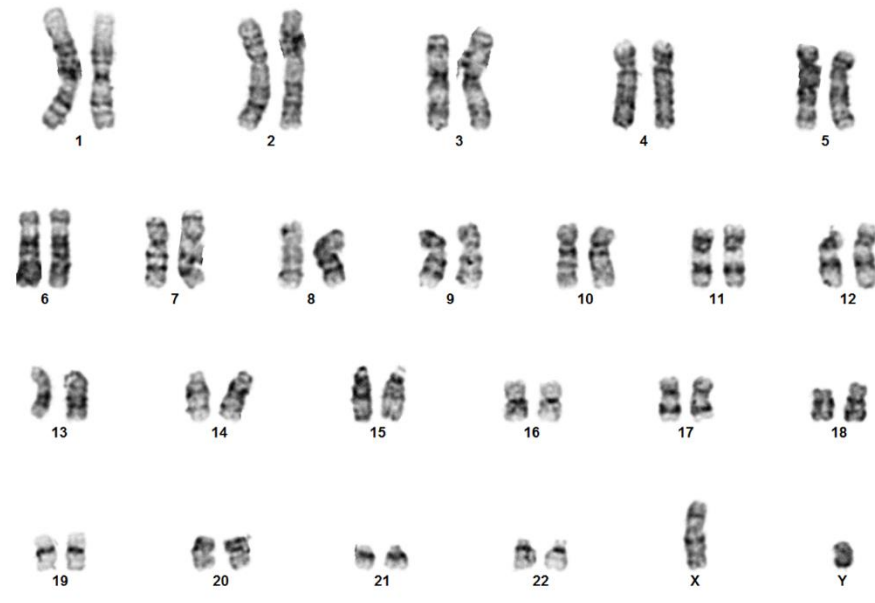

R934L

**Supplementary Figure 3. CRISPR edited iPSCs have a normal karyotype.** Karyotypes of I1061T and R934L clone 1 iPSCs were analyzed by the Cytogenetics core at Washington University Saint Louis. The WT iPSC karyotype has been previously described (2).

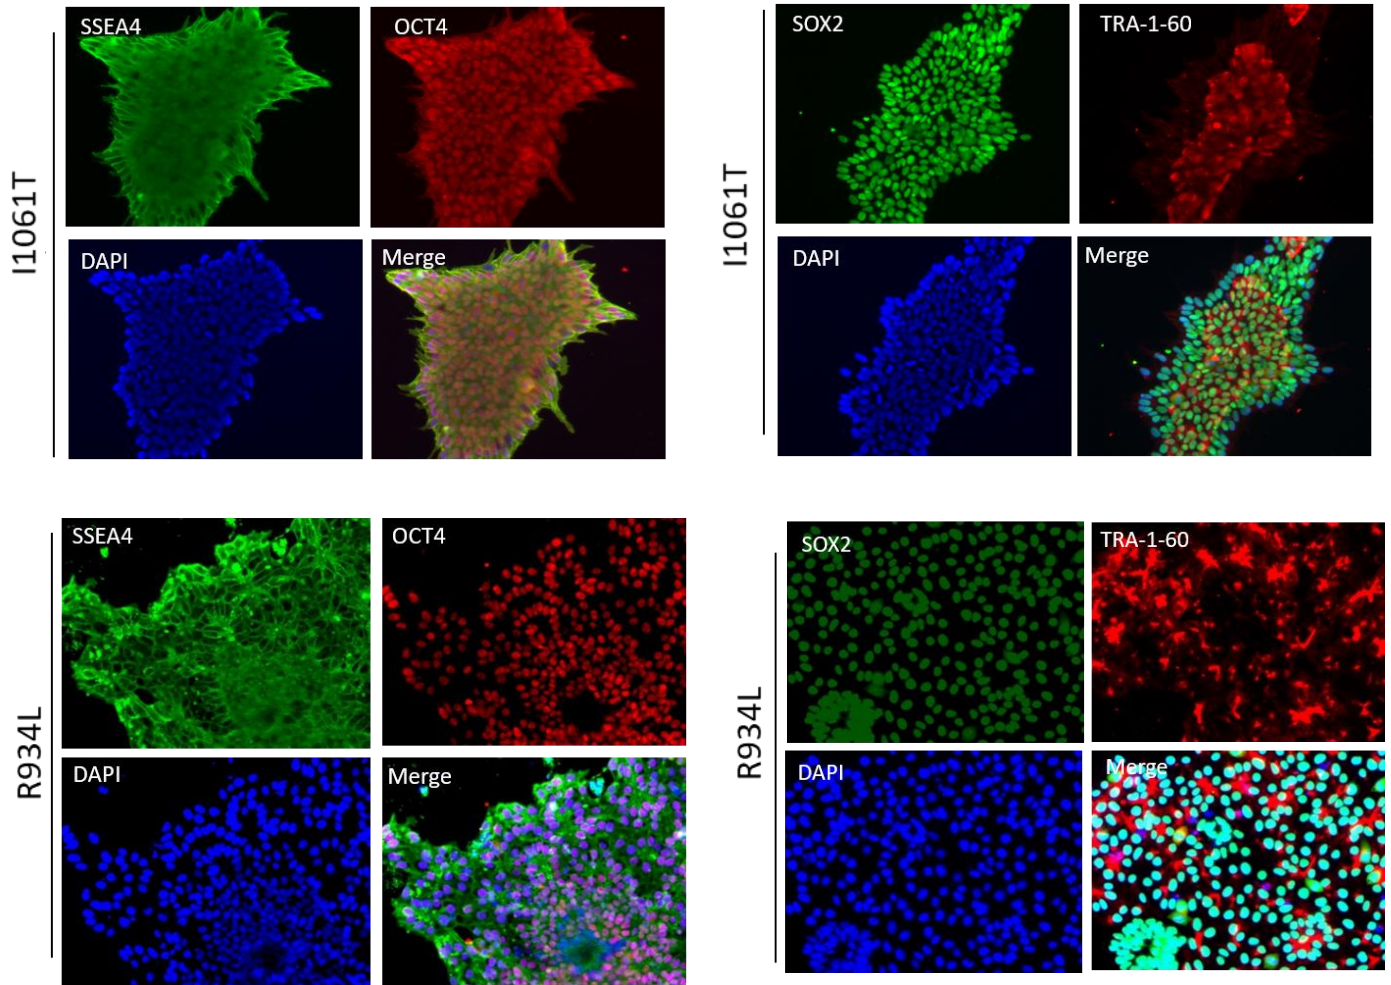

**Supplementary Figure 4. Pluripotency analysis of iPSC lines.** I1061T or R934L iPSCs were stained with the pluripotency markers SSEA4 (left green), OCT4 (left, red), SOX2 (right green), TRA-1-60 (right red), or DNA with DAPI (blue). Positive immunoreactivity for SSEA4, OCT4, SOX2 and TRA-1-60 indicates that both lines are pluripotent. WT iPSC pluripotency has been previously described (2).

**A**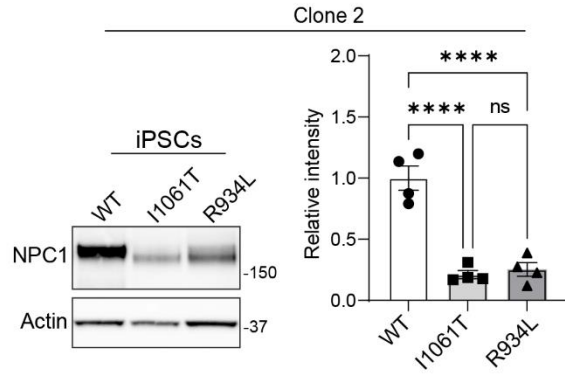**B**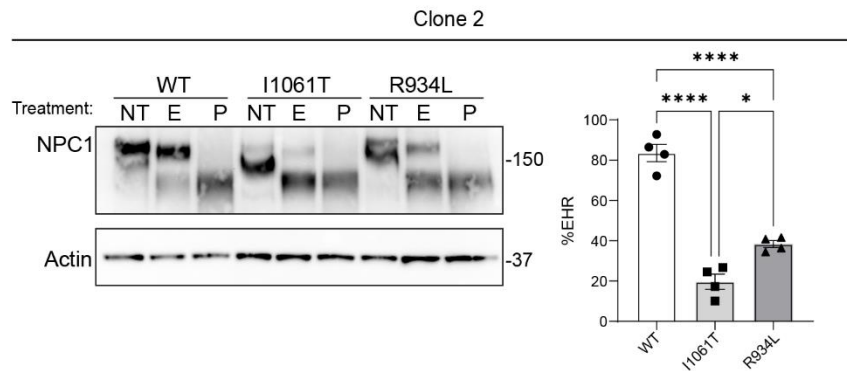

**Supplementary Figure 5. Characterization of NPC1 trafficking in multiple iPSC clones.** Lysates from an additional independent clone for each mutation (I1061T or R934L) were analyzed for **A.** total NPC1 (quantified at right), or **B.** incubated with no treatment (NT) or digested with EndoH (E) or PNGase F (P), then subjected to western blot (quantified at right). Data are mean  $\pm$  s.e.m. from 4 independent experiments. n.s., not significant,  $*P \leq 0.05$ ,  $***P \leq 0.001$ ,  $****P \leq 0.0001$  by ANOVA with Tukey's posthoc; **A.**  $F=111.6$ ,  $42.05$ ;  $DF=2$ . **B.**  $F=90.45$ ,  $152.5$ ;  $DF=2$ .

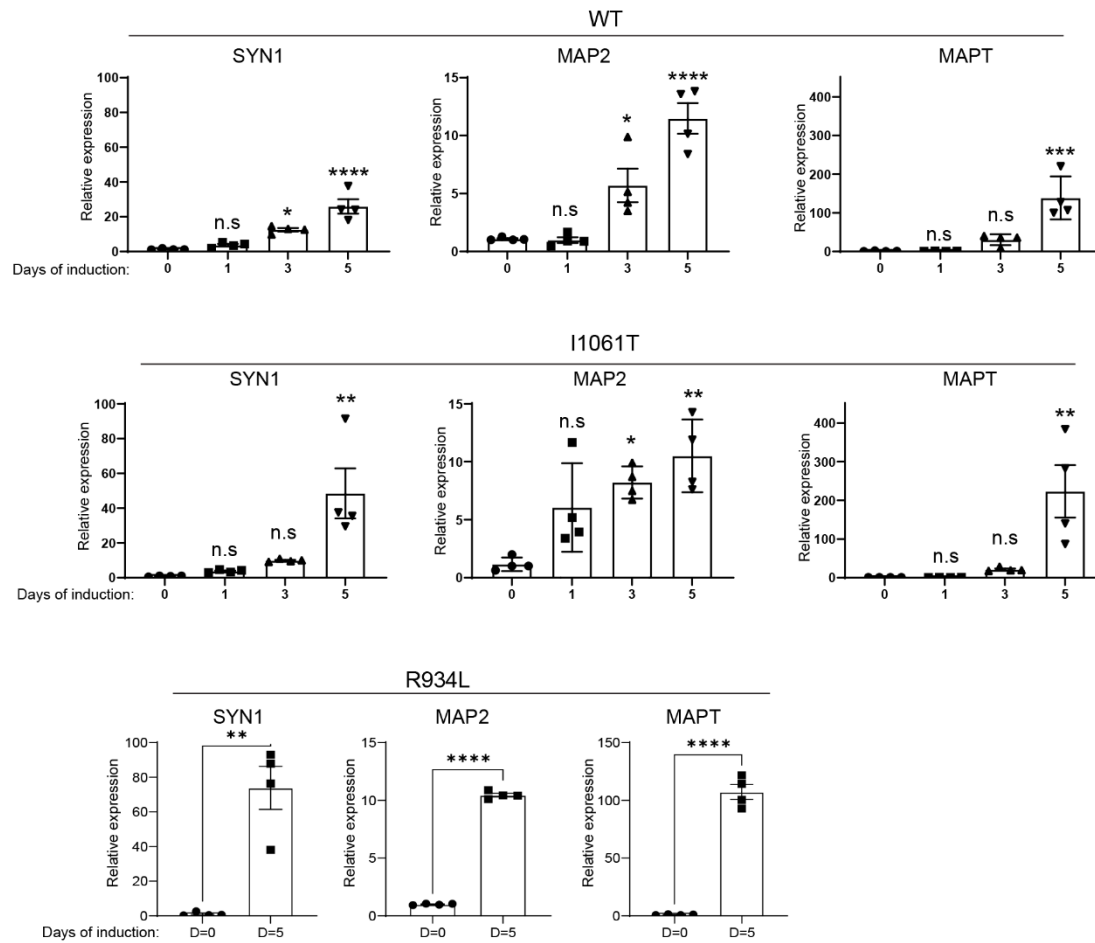

**Supplementary Figure 6. Characterization of iPSC iNeuron clones.** iNeuron differentiation was confirmed by qPCR of WT, I1061T, and R934L iNeuron iPSCs at day 0, 1, 3, and 5 post differentiation using probes for SYN1, MAP2, and MAPT. Data are mean  $\pm$  s.e.m. from 4 independent experiments. n.s., not significant,  $*P \leq 0.05$ ,  $***P \leq 0.001$ ,  $****P \leq 0.0001$  by WT, I1061T=ANOVA with Tukey's posthoc or R934L t-test. WT, I1061T:  $F=26.7, 25.2, 21, 9.4, 9.5, 10.2, DF=3$ , R934L  $t=5.9, 58.1, 16.32, DF=6$ .



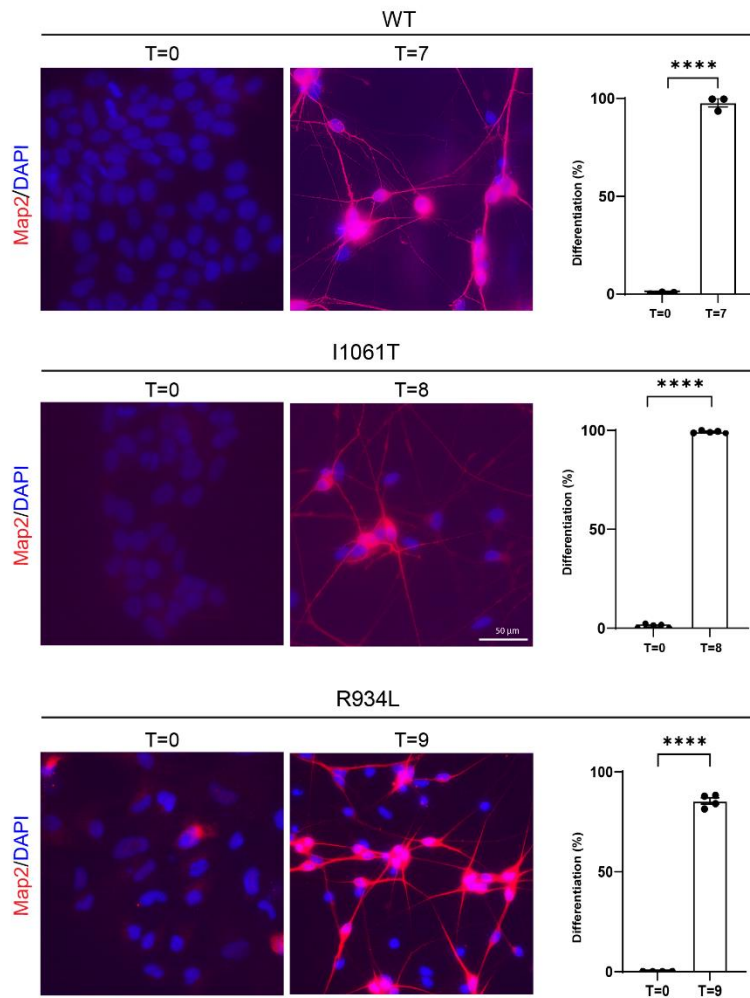

**Supplementary Figure 7. Imaging characterization of iPSC iNeuron clones.** WT, I1061T, and R934L iPSC iNeurons were untreated (T=0) or treated with doxycycline for 7-9 days and stained with DAPI (blue) or MAP2 (red). Percentage of MAP2 positive somas with projections quantified at right. Data are mean  $\pm$  s.e.m. from 3, 5, or 4 independent experiments, \*\*\*\* $P \leq 0.0001$  by t-test. (WT)  $t=44.93$ ,  $df=4$ , (I1061T)  $t=178.1$ ,  $df=8$ , (R934L)  $t=53.0$ ,  $df=6$ .

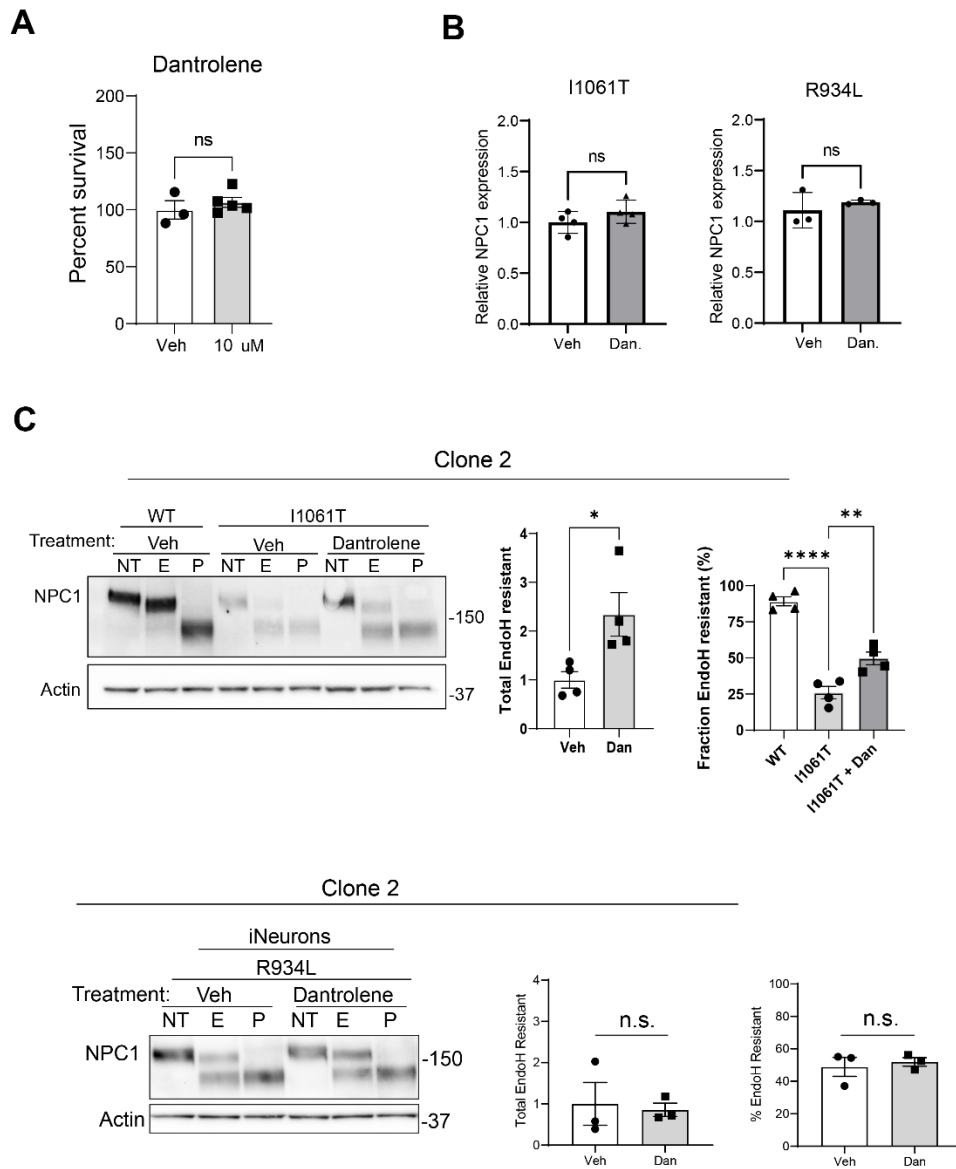

**Supplementary Figure 8. RyR antagonist treatment of iPSC iNeurons. A.** I1061T-NPC1 iNeurons were treated with vehicle (Veh) or dantrolene (10  $\mu$ M) for 5 days and cell viability was measured using the CyQUANT XTT Assay. **B.** NPC1 gene expression (qPCR) of I1061T or R934L with Veh or dantrolene (Dan) treatment for 5 days. **C.** Clone 2 of WT, I1061T, or R934L iNeurons were treated with Veh or Dan for 5 days and lysates were collected and analyzed by EndoH assay (quantified at right). Data are mean  $\pm$  s.e.m. from  $n=3-5$  independent experiments,  $*P \leq 0.05$ ,  $**P \leq 0.01$ ,  $***P \leq 0.001$ ,  $****P \leq 0.0001$  by t-test or ANOVA with Tukey's posthoc. **A.**  $t=0.8$ ,  $df=6$ . **B.**  $t=1.3$ ,  $df=6$ . **C.**  $t=2.8$ ,  $df=6$ ,  $F=63.9$ ,  $df=2$ ;  $t=0.2$ ,  $0.4$ ,  $df=4$ .

| STR       | WT (Parental) | I1061T | R934L  |
|-----------|---------------|--------|--------|
| AMELX     | X, Y          | X, Y   | X, Y   |
| PentaE    | 7, 17         | 7, 17  | 7, 17  |
| D21S11    | 29            | 29     | 29     |
| D19S433   | 16            | 16     | 16     |
| D13S317   | 8, 9          | 8, 9   | 8, 9   |
| TPOX      | 10, 11        | 10, 11 | 10, 11 |
| D7S820    | 11, 12        | 11, 12 | 11, 12 |
| D5S818    | 12            | 12     | 12     |
| CSF1PO    | 10, 12        | 10, 12 | 10, 12 |
| D16S539   | 9, 13         | 9, 13  | 9, 13  |
| D3S1358   | 14, 16        | 14, 16 | 14, 16 |
| TH01      | 7, 8          | 7, 8   | 7, 8   |
| D8S1179   | 9, 11         | 9, 11  | 9, 11  |
| VWA       | 16, 18        | 16, 18 | 16, 18 |
| FGA       | 22, 23        | 22, 23 | 22, 23 |
| D2S1338   | 16, 20        | 16, 20 | 16, 20 |
| D18S51 #1 | 17, 19        | 17, 19 | 17, 19 |

**Supplementary Table 1. Short tandem repeat analysis of iPSC lines.** Short tandem repeat (STR) analysis of 16 loci was performed by Genome Engineering and iPSC center (GEiC) at Washington University in St. Louis.

### Supplementary References:

1. Praggastis M, Tortelli B, Zhang J, Fujiwara H, Sidhu R, Chacko A, et al. A murine Niemann-Pick C1 I1061T knock-in model recapitulates the pathological features of the most prevalent human disease allele. *J Neurosci.* 2015;35(21):8091-106.
2. Chen YH, and Pruett-Miller SM. Improving single-cell cloning workflow for gene editing in human pluripotent stem cells. *Stem Cell Res.* 2018;31:186-92.
